# Supplementary material for: Molecular Dynamics Simulation for the Demulsification of O/W Emulsion under Pulsed Electric Field
Source: MDPI journal article supplement (doi:10.3390/molecules27082559), 2022-04-15
Supplement: s1 [file s1]

Supporting Information

# Molecular Dynamics Simulation for the Demulsification of O/W Emulsion under Pulsed Electric Field

Shasha Liu <sup>1,2</sup>, Shiling Yuan <sup>1</sup> and Heng Zhang <sup>1,\*</sup>

<sup>1</sup> School of Chemistry and Chemical Engineering, Shandong University, Jinan 250100, China;

liushasha325@163.com (S.L.); shilingyuan@sdu.edu.cn (S.Y.)

<sup>2</sup> School of Chemistry and Chemical Engineering, Qilu Normal University, Jinan 250100, China

\* Correspondence: zhangheng@sdu.edu.cn.

---

<sup>\*a</sup>Corresponding Author, E-mail: zhangheng@sdu.edu.cn.

Tel: +86-531-88366428.

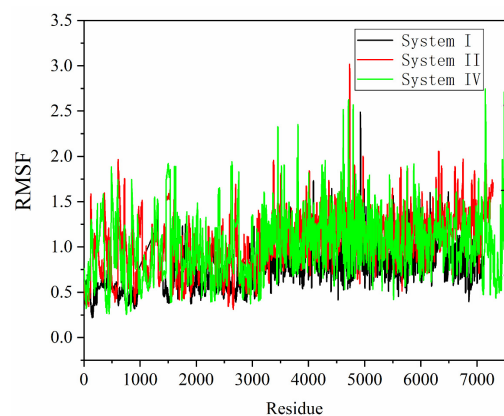

Figure S1. Root-mean-square fluctuation (RMSF) of oil droplets in system I, system II and system IV.

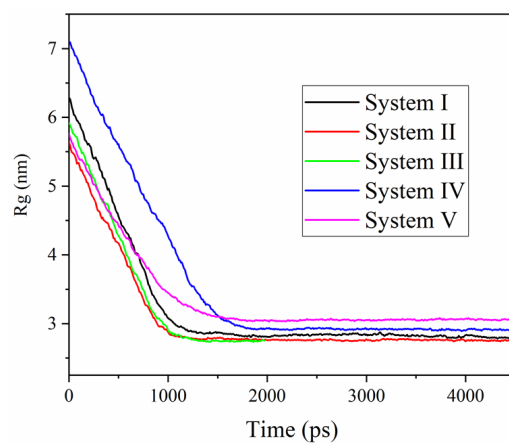

Figure S2. Radius of gyration (Rg) of oil droplets in five systems.

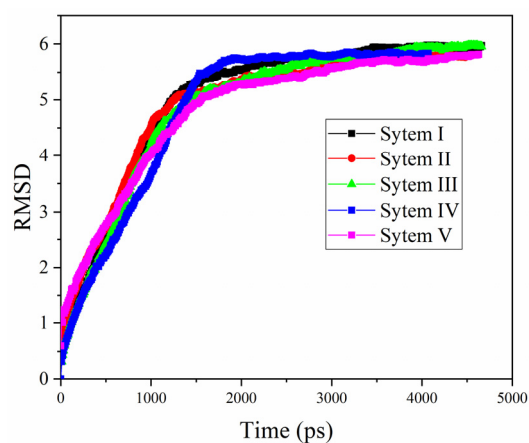

Figure S3. Root-mean-square deviation (RMSD) of oil droplets in five systems.
